# Supplementary material for: Estimated Staff Time Effort, Costs, and Medicaid Revenues for Coordinated Specialty Care Clinics Serving Clients With First-Episode Psychosis
Source: Atypon-hosted journal article supplement (doi:10.1176/appi.ps.201900039), 2019-03-27
Supplement: appi.ps.201900039.ds001.pdf [file appi.ps.201900039.ds001.pdf]

On-Line Supplement Table 1. Percent of clinical team members' time spent on activities.

| Clinic               | Total Census | Medicaid Census | Percent of Team Members Time Spent on Activities |                                   |                 |                |                          |
|----------------------|--------------|-----------------|--------------------------------------------------|-----------------------------------|-----------------|----------------|--------------------------|
|                      |              |                 | State Plan Services                              | Home and Community Based Services | Care Management | Administrative | Total Revenue Generating |
| 1                    | 26           | 12              | 35%                                              | 28%                               | 16%             | 22%            | 62%                      |
| 2                    | 23           | 16              | 68%                                              | 18%                               | 12%             | 1%             | 87%                      |
| 3                    | 27           | 14              | 42%                                              | 13%                               | 12%             | 33%            | 56%                      |
| 4                    | 32           | 20              | 55%                                              | 7%                                | 23%             | 15%            | 62%                      |
| 5                    | 36           | 20              | 86%                                              | 0%                                | 14%             | 0%             | 86%                      |
| 6                    | 22           | 8               | 61%                                              | 0%                                | 20%             | 19%            | 61%                      |
| 7                    | 47           | 17              | 33%                                              | 11%                               | 17%             | 39%            | 44%                      |
| 8                    | 36           | 12              | 75%                                              | 17%                               | 8%              | 0%             | 92%                      |
| 9                    | 20           | 15              | 66%                                              | 31%                               | 3%              | 0%             | 97%                      |
| 10                   | 24           | 8               | 45%                                              | 15%                               | 11%             | 29%            | 61%                      |
| 11                   | 14           | 8               | 52%                                              | 18%                               | 18%             | 12%            | 71%                      |
| 12                   | 25           | 15              | 86%                                              | 7%                                | 3%              | 4%             | 93%                      |
| 13                   | 47           | 36              | 38%                                              | 29%                               | 16%             | 17%            | 67%                      |
| <b>Average</b>       | <b>29</b>    | <b>15</b>       | <b>57%</b>                                       | <b>15%</b>                        | <b>13%</b>      | <b>15%</b>     | <b>72%</b>               |
| <b>St. Deviation</b> | <b>10</b>    | <b>7</b>        | <b>18%</b>                                       | <b>10%</b>                        | <b>6%</b>       | <b>13%</b>     | <b>17%</b>               |

On-Line Supplement Table 2: Estimated costs and revenues for Medicaid clients with first-episode psychosis from 7 sites that reported cost data (revenues estimated from reported Medicaid state plan services and home and community based services (HCBS)).

| Clinic               | Medicaid Census | Monthly Clinic Costs Attributed to Medicaid Clients | Monthly Clinic Medicaid State Plan and HCBS Revenue | Monthly Per Client Cost | Monthly Per Client State Plan and HCBS Revenue | Monthly Per Client Care Management Revenue | Total Monthly Per Client Medicaid Revenue | Monthly Deficit per Client | Deficit as % of Expenses |
|----------------------|-----------------|-----------------------------------------------------|-----------------------------------------------------|-------------------------|------------------------------------------------|--------------------------------------------|-------------------------------------------|----------------------------|--------------------------|
| 1                    | 12              | \$21,429                                            | \$9,764                                             | \$1,786                 | \$814                                          | \$154                                      | \$968                                     | (\$818)                    | 46%                      |
| 3                    | 14              | \$23,811                                            | \$12,965                                            | \$1,701                 | \$926                                          | \$154                                      | \$1,080                                   | (\$621)                    | 37%                      |
| 4                    | 20              | \$26,078                                            | \$6,254                                             | \$1,304                 | \$313                                          | \$154                                      | \$467                                     | (\$837)                    | 64%                      |
| 5                    | 20              | \$21,611                                            | \$6,749                                             | \$1,081                 | \$337                                          | \$154                                      | \$491                                     | (\$590)                    | 55%                      |
| 7                    | 17              | \$15,768                                            | \$6,609                                             | \$928                   | \$389                                          | \$154                                      | \$543                                     | (\$385)                    | 41%                      |
| 8                    | 12              | \$14,258                                            | \$3,583                                             | \$1,188                 | \$299                                          | \$154                                      | \$453                                     | (\$735)                    | 62%                      |
| 10                   | 8               | \$13,130                                            | \$3,848                                             | \$1,641                 | \$481                                          | \$154                                      | \$635                                     | (\$1,006)                  | 61%                      |
| <b>Average</b>       | <b>15</b>       | <b>\$19,441</b>                                     | <b>\$7,110</b>                                      | <b>\$1,375</b>          | <b>\$508</b>                                   | <b>\$154</b>                               | <b>\$662</b>                              | <b>(\$713)</b>             | <b>52%</b>               |
| <b>St. Deviation</b> | <b>4</b>        | <b>\$5,033</b>                                      | <b>\$3,305</b>                                      | <b>\$335</b>            | <b>\$256</b>                                   | <b>\$0</b>                                 | <b>\$256</b>                              | <b>\$202</b>               | <b>11%</b>               |
